# Supplementary material for: Evaluation of Rhodamine B Photocatalytic Degradation over BaTiO3-MnO2 Ceramic Materials
Source: MDPI journal article supplement (doi:10.3390/ma14123152), 2021-06-08

Supplementary Materials

# Evaluation of Rhodamine B Photocatalytic Degradation over BaTiO<sub>3</sub>-MnO<sub>2</sub> Ceramic Materials

Iwona Kuźniarska-Biernacka <sup>1,\*</sup>, Barbara Garbarz-Glos <sup>2,3,\*</sup>, Elżbieta Skiba <sup>4</sup>, Waldemar Maniukiewicz <sup>4</sup>, Wojciech Bąk <sup>2</sup>, Maija Antonova <sup>5</sup>, Susana L. H. Rebelo <sup>1</sup> and Cristina Freire <sup>1</sup>

<sup>1</sup> REQUIMTE/LAQV, Departamento de Química e Bioquímica, Faculdade de Ciências, Universidade do Porto, Rua do Campo Alegre s/n, 4169-007 Porto, Portugal; susana.rebelo@fc.up.pt (S.L.H.R.); acfreire@fc.up.pt (C.F.)

<sup>2</sup> Institute of Technology, Pedagogical University, Podchorążych 2, 30-084 Kraków, Poland; wojciech.bak@up.krakow.pl

<sup>3</sup> Institute of Technology, The Jan Grodek State University in Sanok, 6 Reymonta Str., 38-500 Sanok, Poland

<sup>4</sup> Institute of General and Ecological Chemistry, Lodz University of Technology, Żeromskiego 116, 90-924 Łódź, Poland; elzbieta.skiba@p.lodz.pl (E.S.); waldemar.maniukiewicz@p.lodz.pl (W.M.)

<sup>5</sup> Institute of Solid State Physics, University of Latvia, Kengaraga 8, LV-1063 Riga, Latvia; Maija.Antonova@cfi.lu.lv

\* Correspondence: iwonakb@fc.up.pt (I.K.-B.); barbara.garbarz-glos@up.krakow.pl (B.G.-G.)

Table S1. Photodecolorization of RhB and calculated reaction rates of different photocatalysts.

| Photocatalyst | C/C <sub>0</sub>         | k <sup>a</sup> (min <sup>-1</sup> )                       | R <sup>2</sup>           |
|---------------|--------------------------|-----------------------------------------------------------|--------------------------|
| BTO           | 0.88                     | 3.0×10 <sup>-4</sup>                                      | 0.78                     |
| BTO_1         | 0.47 (0.76) <sup>b</sup> | 1.4×10 <sup>-3</sup> (8.0×10 <sup>-4</sup> ) <sup>b</sup> | 0.99 (0.99) <sup>b</sup> |
| BTO_2         | 0.40 (0.64) <sup>b</sup> | 1.9×10 <sup>-3</sup> (1.2×10 <sup>-3</sup> ) <sup>b</sup> | 0.97 (0.99) <sup>b</sup> |
| BTO_3         | 0.30 (0.70) <sup>b</sup> | 3.3×10 <sup>-3</sup> (1.0×10 <sup>-3</sup> ) <sup>b</sup> | 0.91 (0.98) <sup>b</sup> |

<sup>a</sup> k – first order rate constant calculated from  $\ln(C/C_0) = -kt$ , where C<sub>0</sub> and C (mg L<sup>-1</sup>) are the concentrations of RhB at time t (min); <sup>b</sup> values in parenthesis for 2<sup>nd</sup> photoreaction cycle

Figure S1. Elemental area-mappings for BTO, BTO\_1 and BTO\_3, representative examples

## BTO

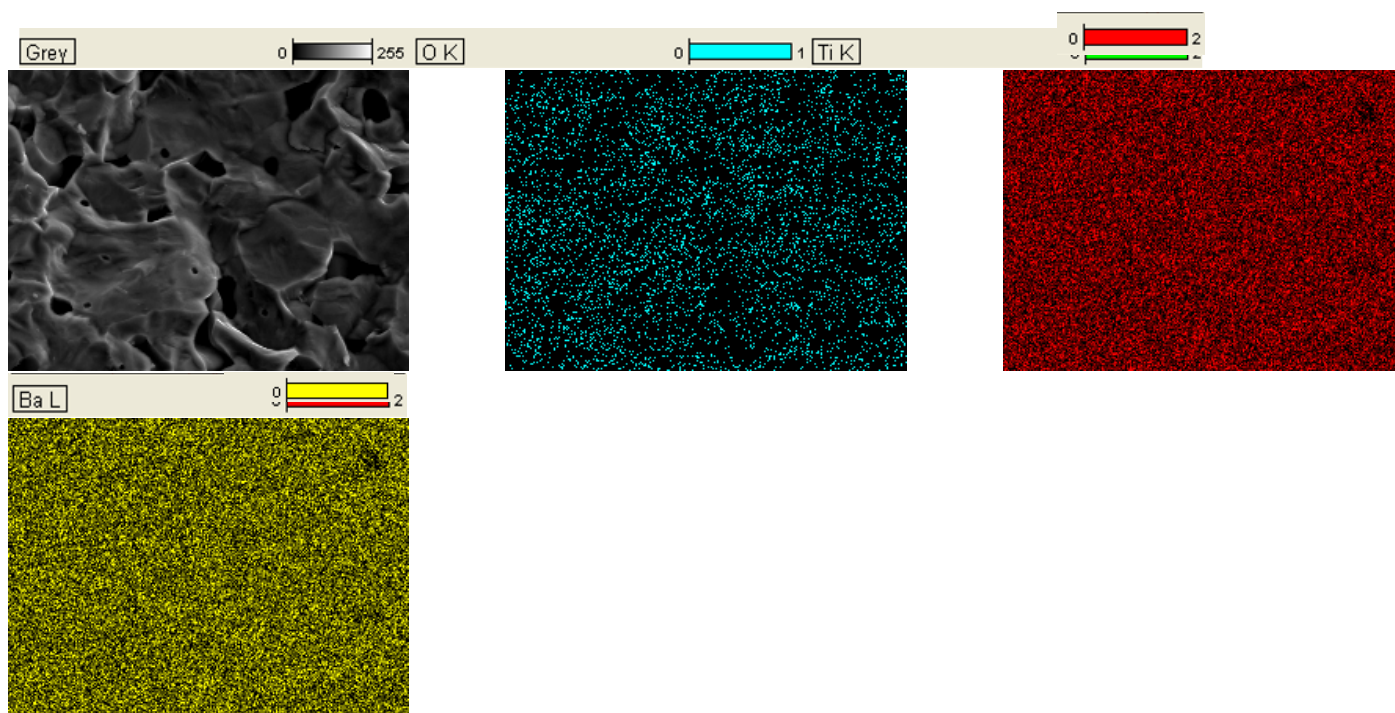

## BTO\_1

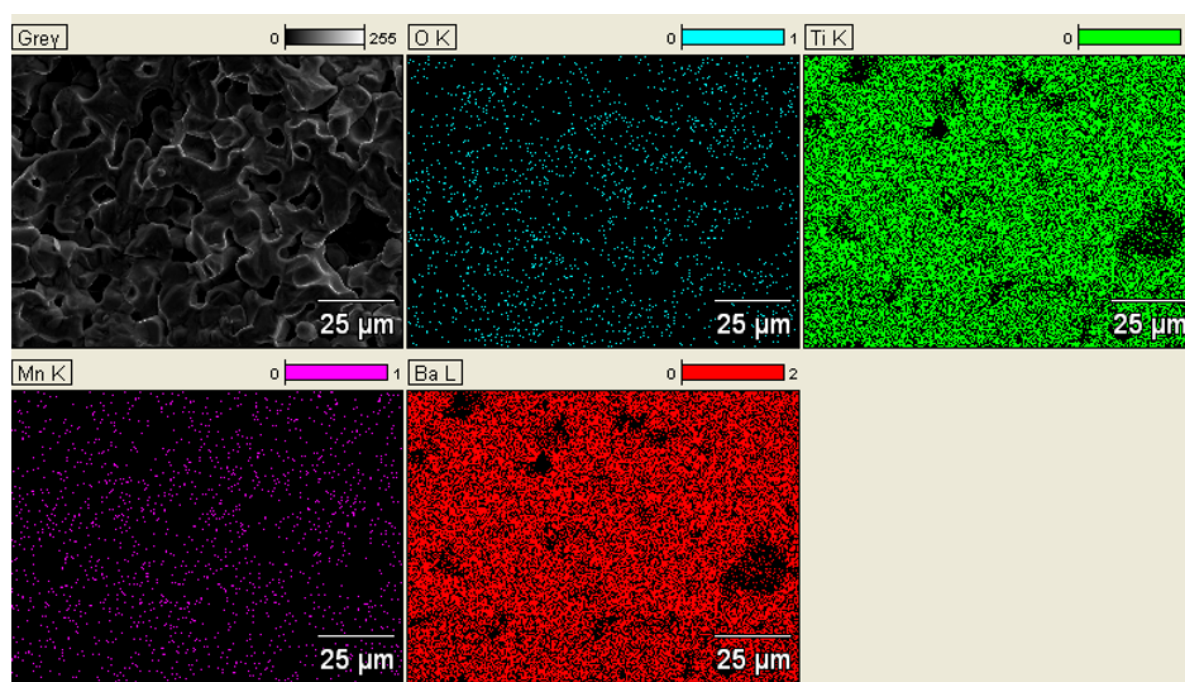

BTO\_3

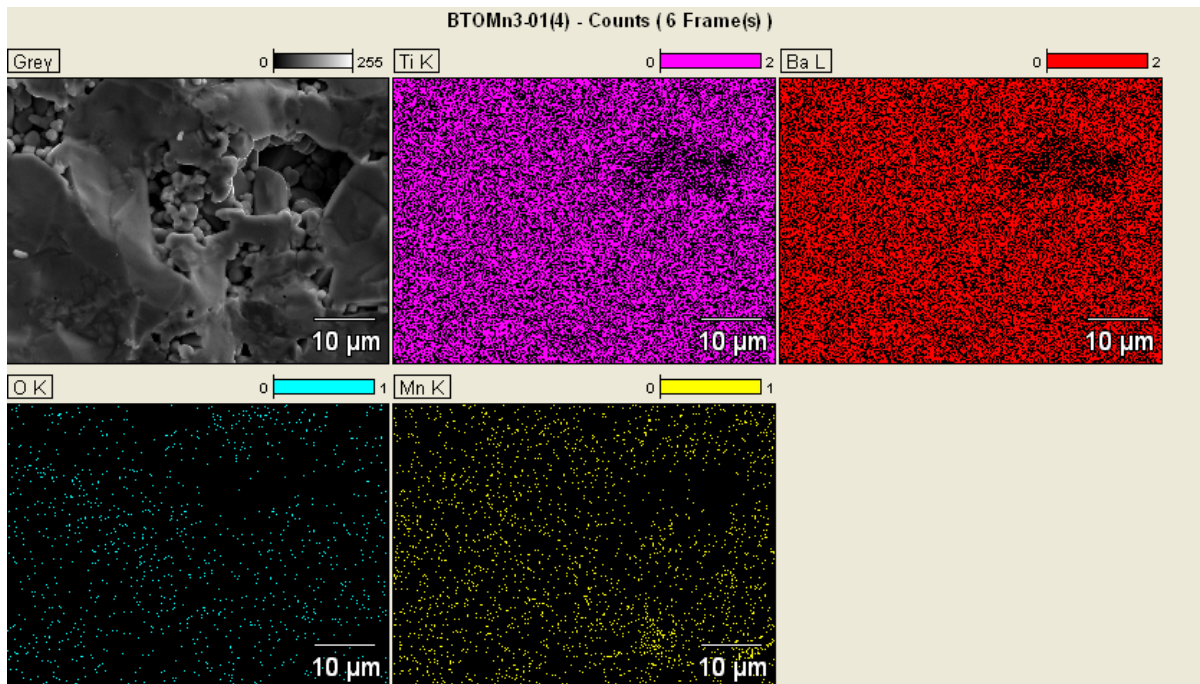

Figure S2. UV-Vis absorption spectra of BaTiO<sub>3</sub> ceramics: BTO (a), BTO\_1 (b), BTO\_2 (c) and BTO\_3 (d) in 220–500 cm<sup>−1</sup> range in Nujol mul

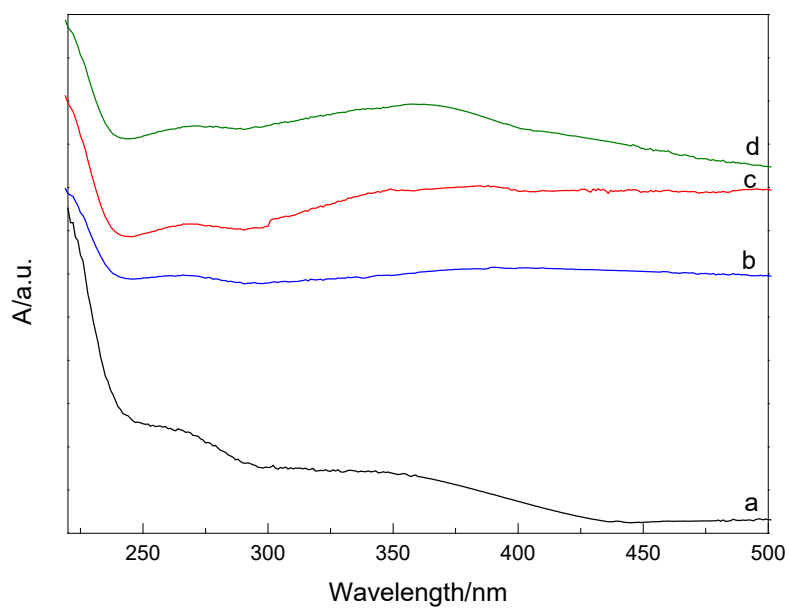

Figure S3. UV-Vis absorption spectra of RhB dye solution with different irradiation time using BTO\_1 as photocatalyst

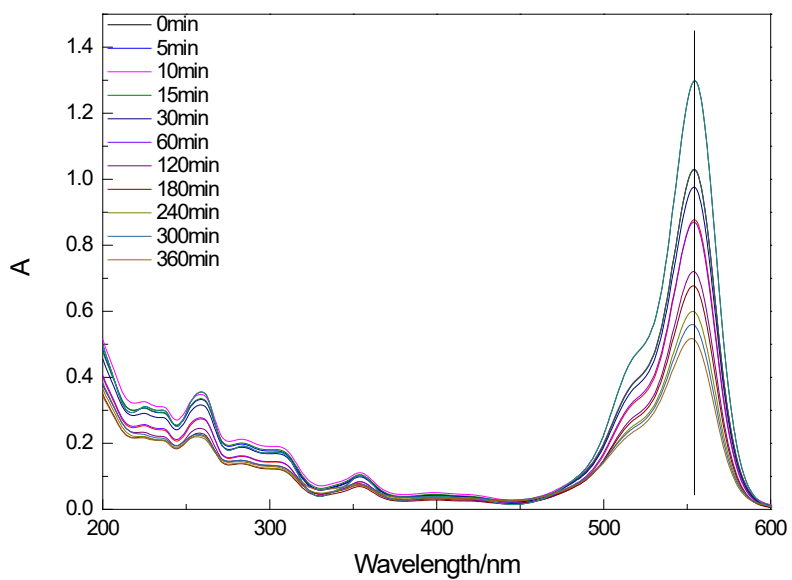

Figure S4. UV-Vis absorption spectra of RhB dye solution with different irradiation time using BTO\_2 as photocatalyst

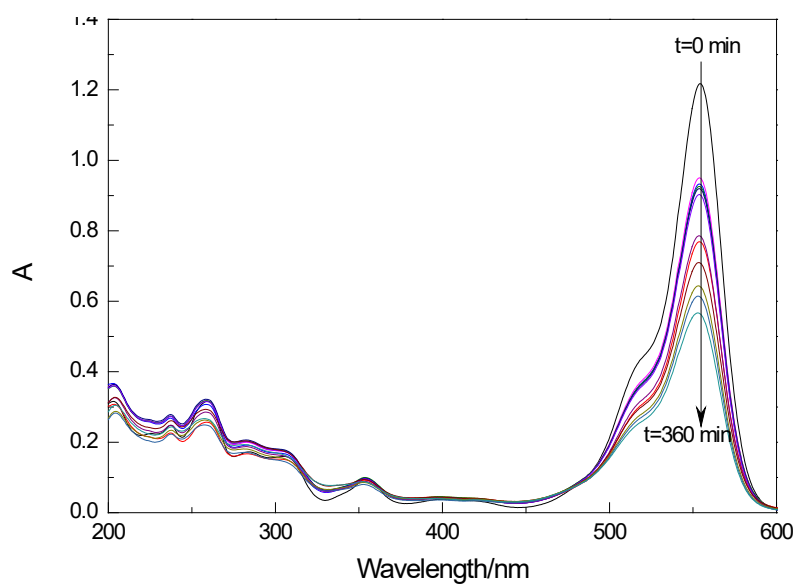

Figure S5. UV-Vis absorption spectra of RhB dye solution with different irradiation time using BTO\_3 as photocatalyst

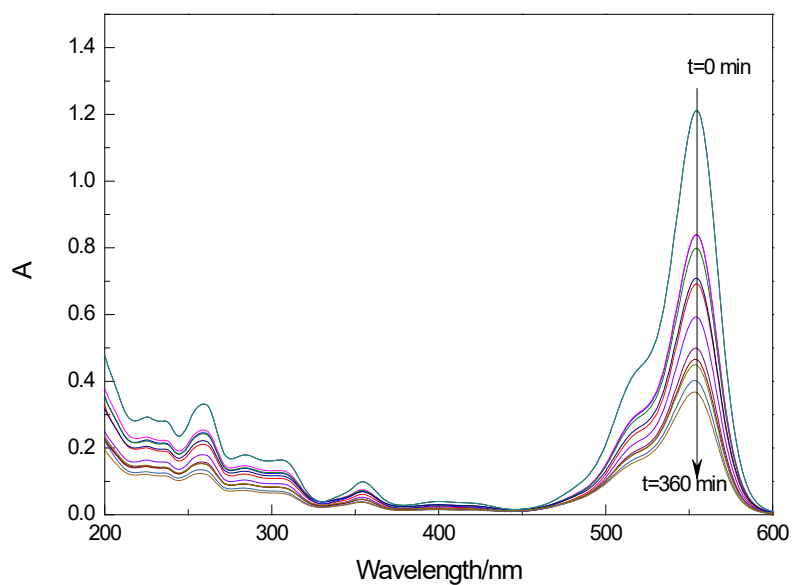

Figure S6. FTIR spectra of BTO\_1 (a), BTO\_2 (b), BTO\_3 (c) and BTO (d) after second photocatalytic cycle.

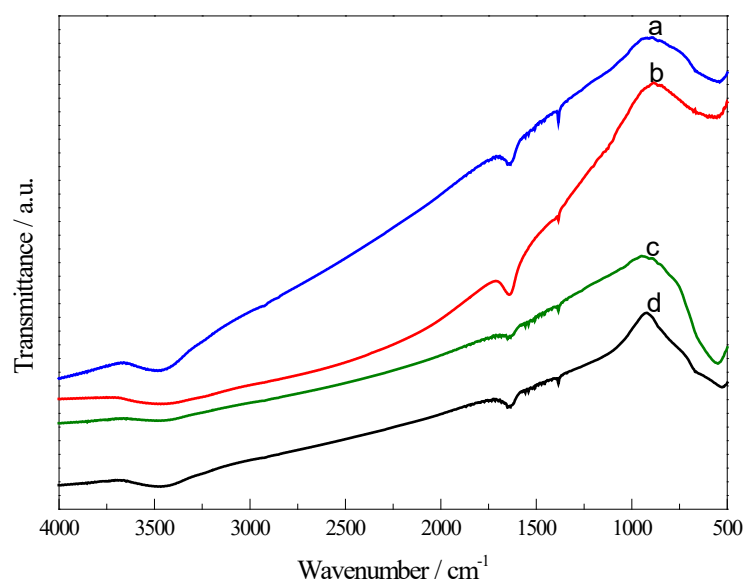

Supplement: s1 [file s1]
